# Supplementary material for: Targeting of AKT1 by miR-143-3p Suppresses Epithelial-to-Mesenchymal Transition in Prostate Cancer
Source: MDPI journal article supplement (doi:10.3390/cells12182207), 2023-09-05
Supplement: s1 [file s1]

## Supplementary Figures

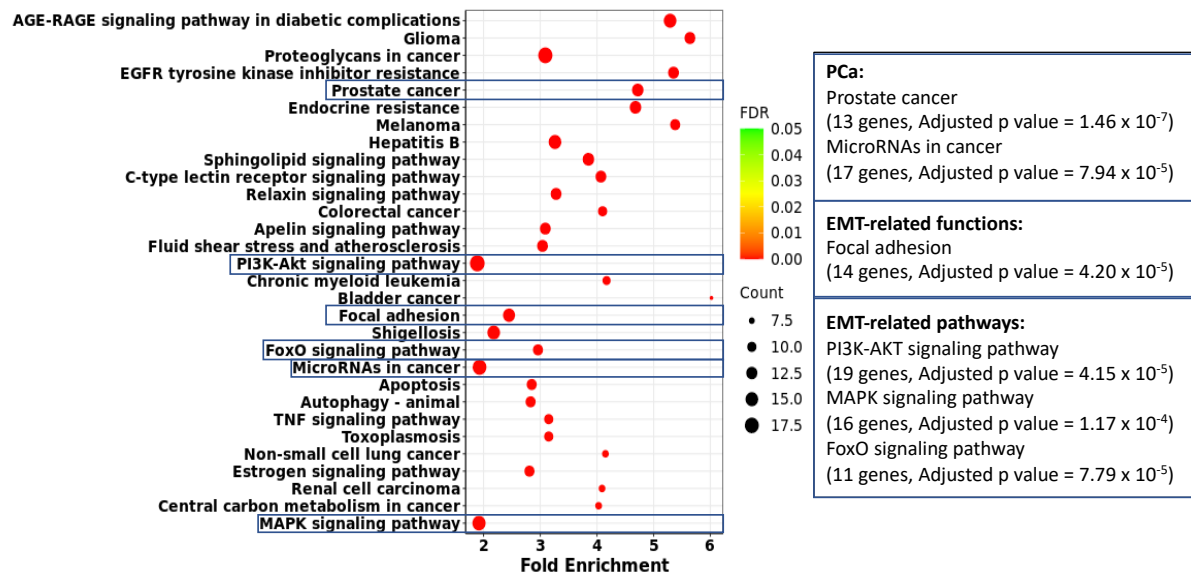

Figure S1. Bubble plot of KEGG functional enrichment analysis of miR-143-3p targets generated by CancerMIRNome.

EMT-related signaling pathways:

“PI3K-AKT”: [https://dbemt.bioinfo-minzhao.org/literature\\_highlight.cgi?gene=207](https://dbemt.bioinfo-minzhao.org/literature_highlight.cgi?gene=207) (accessed on 10 May 2023).

“MAPK”: [https://dbemt.bioinfo-minzhao.org/literature\\_highlight.cgi?gene=5594](https://dbemt.bioinfo-minzhao.org/literature_highlight.cgi?gene=5594) (accessed on 10 May 2023).

“FoxO”: [https://dbemt.bioinfo-minzhao.org/literature\\_highlight.cgi?gene=2308](https://dbemt.bioinfo-minzhao.org/literature_highlight.cgi?gene=2308). (accessed on 10 May 2023).

FDR = False Discovery Rate

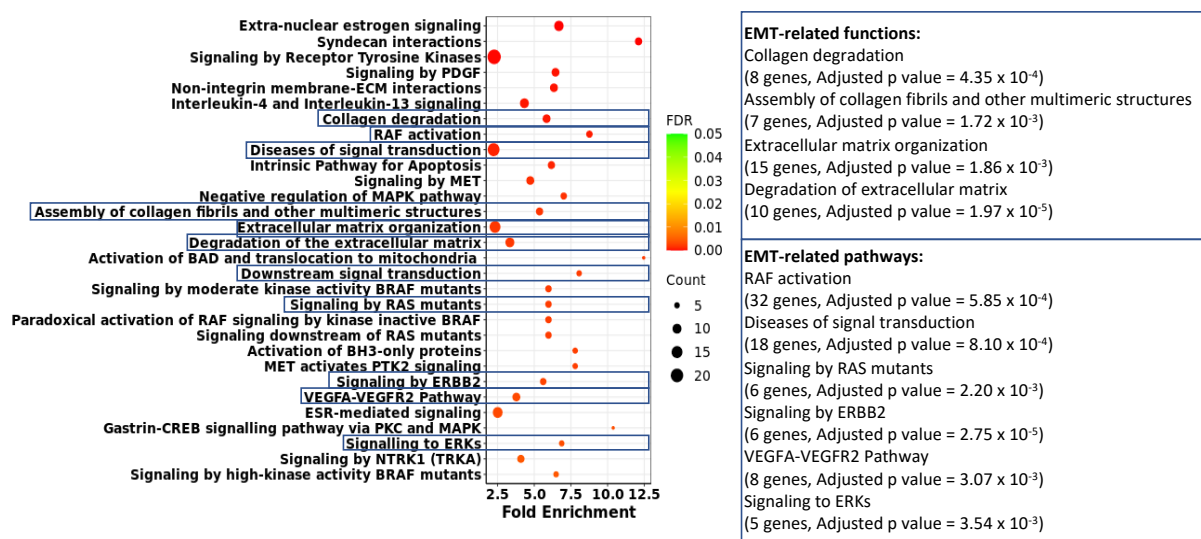

**Figure S2. Bubble plot of REACTOME functional enrichment analysis of miR-143-3p targets generated by CancerMIRNome.**

EMT-related signaling pathways:

“RAF”: [https://dbemt.bioinfo-minzhao.org/literature\\_highlight.cgi?gene=5894](https://dbemt.bioinfo-minzhao.org/literature_highlight.cgi?gene=5894) (accessed on 12 May 2023).

“RAS”: [https://dbemt.bioinfo-minzhao.org/literature\\_highlight.cgi?gene=3845](https://dbemt.bioinfo-minzhao.org/literature_highlight.cgi?gene=3845) (accessed on 12 May 2023).

“ERBB3”: [https://dbemt.bioinfo-minzhao.org/literature\\_highlight.cgi?gene=2064](https://dbemt.bioinfo-minzhao.org/literature_highlight.cgi?gene=2064) (accessed on 12 May 2023).

“VEGFA-VEGFR2”: [https://dbemt.bioinfo-minzhao.org/literature\\_highlight.cgi?gene=7422](https://dbemt.bioinfo-minzhao.org/literature_highlight.cgi?gene=7422) (accessed on 12 May 2023).

“PI3K-AKT”: [https://dbemt.bioinfo-minzhao.org/literature\\_highlight.cgi?gene=207](https://dbemt.bioinfo-minzhao.org/literature_highlight.cgi?gene=207) (accessed on 12 May 2023).

**FDR** = False Discovery Rate

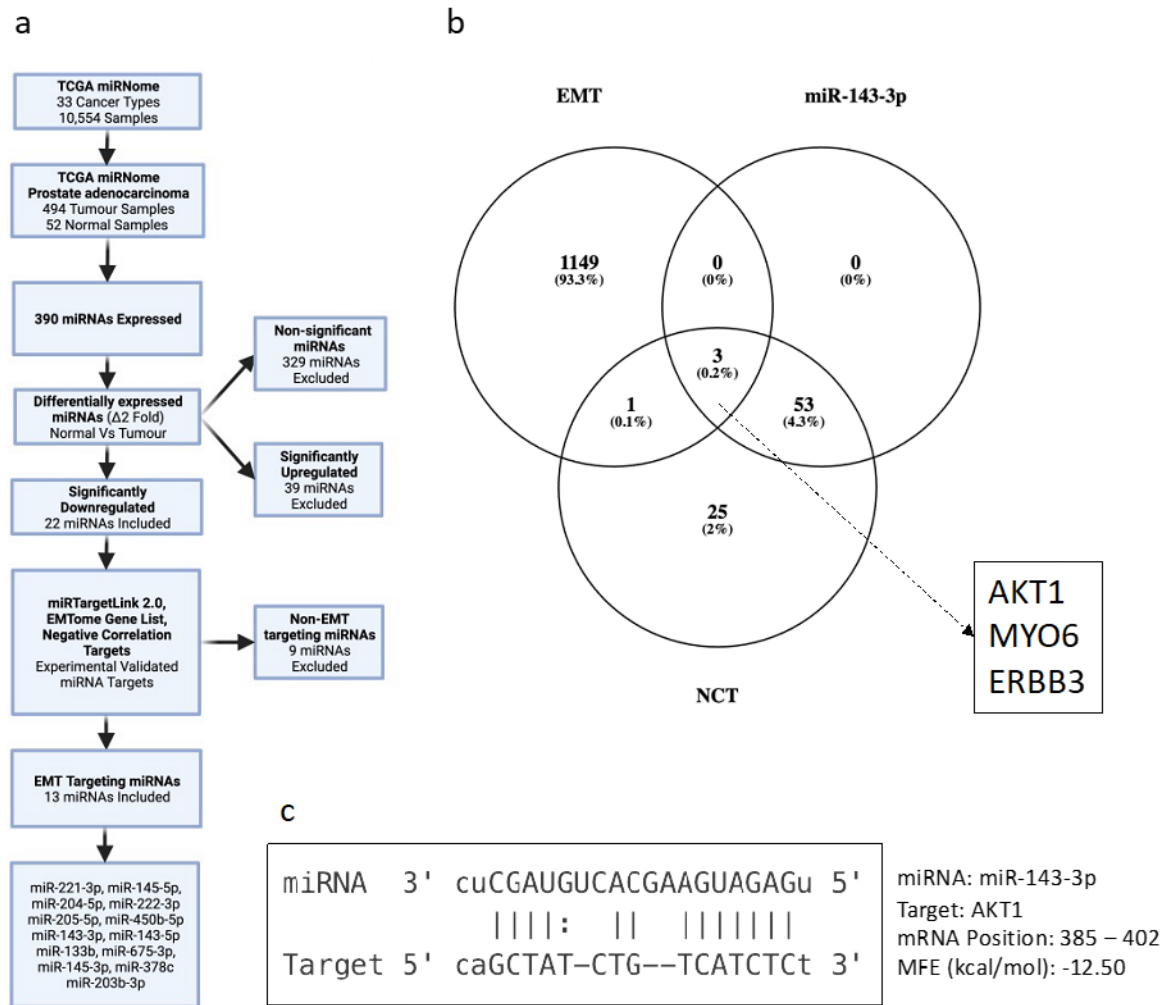

**Figure S3. *In silico* selection of downregulated miRNAs in prostate cancer associated with EMT.** (a) Selection process for identifying EMT associated miRNAs in prostate cancer. (b) Targets of the significantly downregulated miR-143-3p were predicted using miRTargetLink 2.0. Targets were cross-referenced to EMTome gene list and negative correlation targets in prostate cancer. (c) miR-TarBase computational prediction of miR-143-3p-AKT1 interaction. **EMT** = epithelial-to-mesenchymal transition; **NTC** = Negative Correlation Targets.

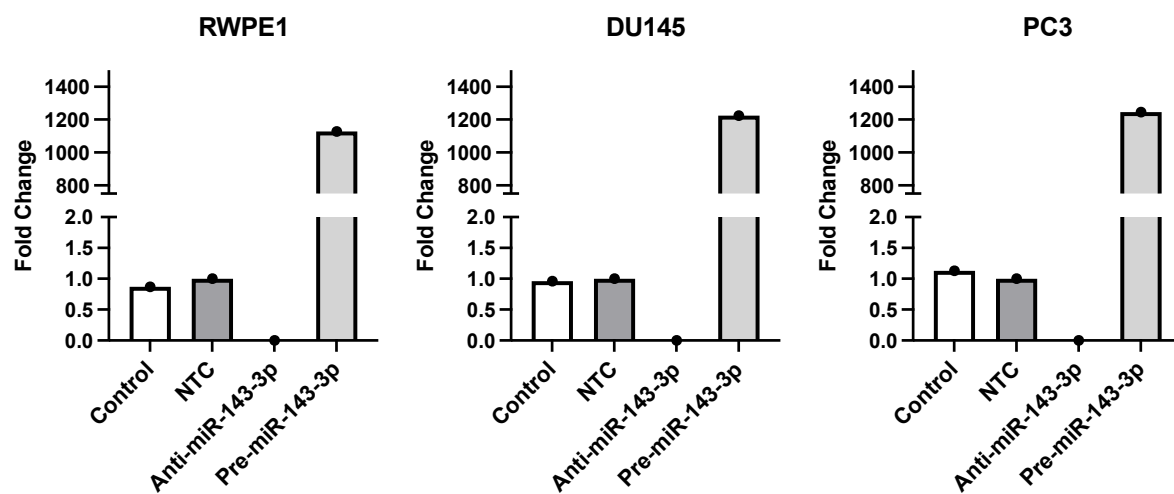

Figure S4: Confirmation of miR-143-3p overexpression and inhibition in prostate cell lines. ( $n = 1$ , housekeeping: snRNA U6).

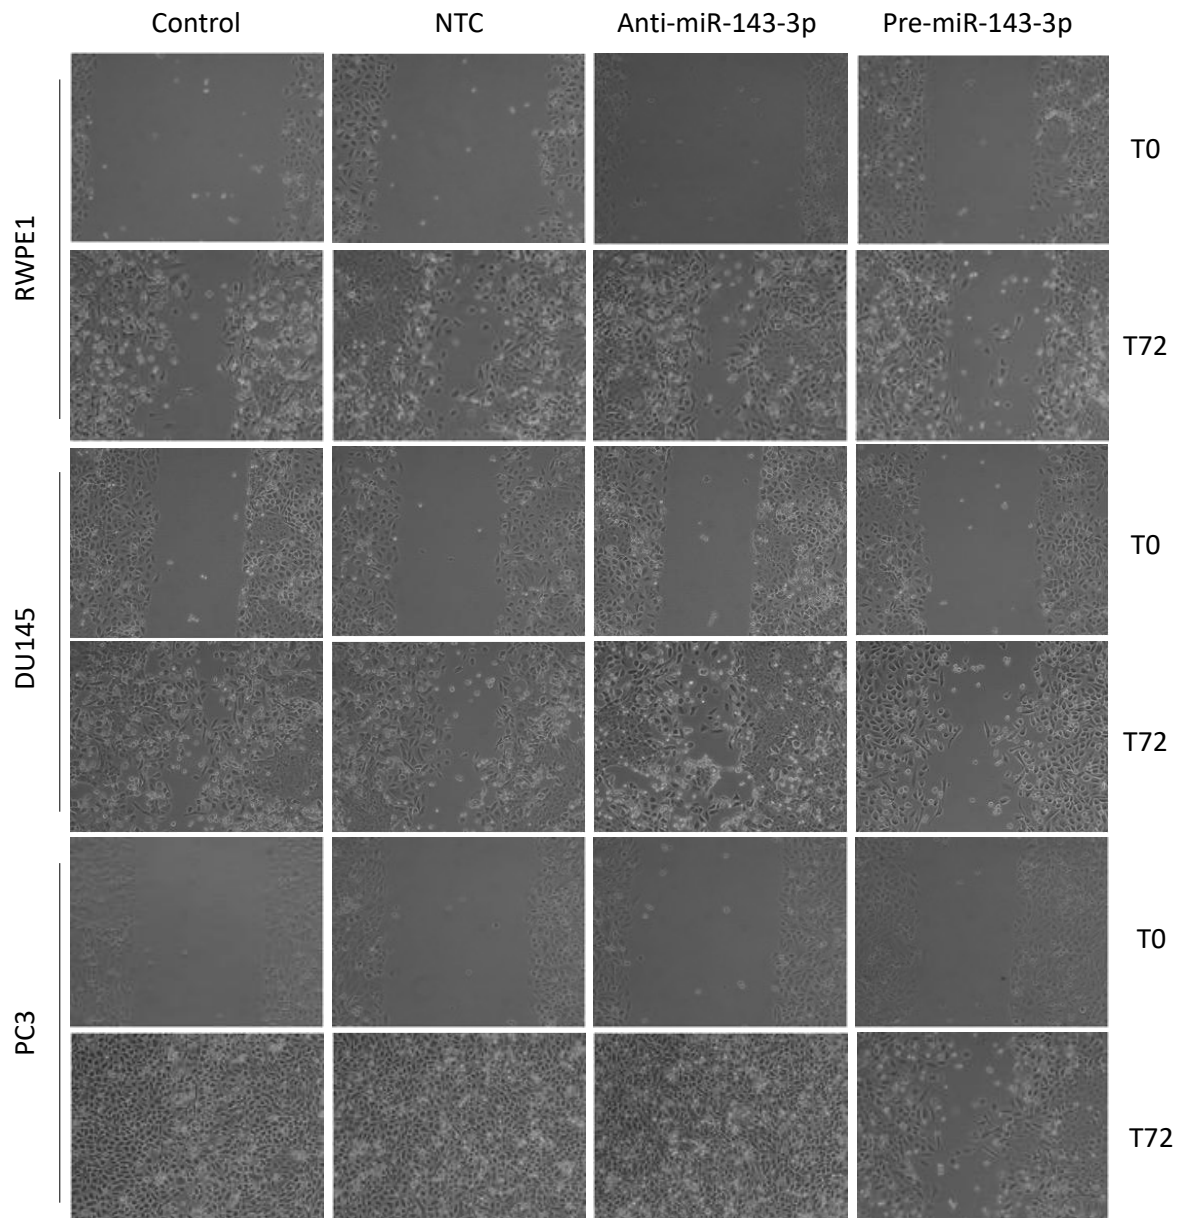

**Figure S5: Representative images of wound-healing assay.** miR-143-3p controls migratory capacity of RWPE1, DU145 and PC3 cell lines. Scratch assay performed at 72 hours post transfection using ImageJ software to quantify wound closure %. Pre-miR-Neg, Anti-miR-143-3p, Pre-miR-143-3p (25 nM). NTC = Non-targeting Control.

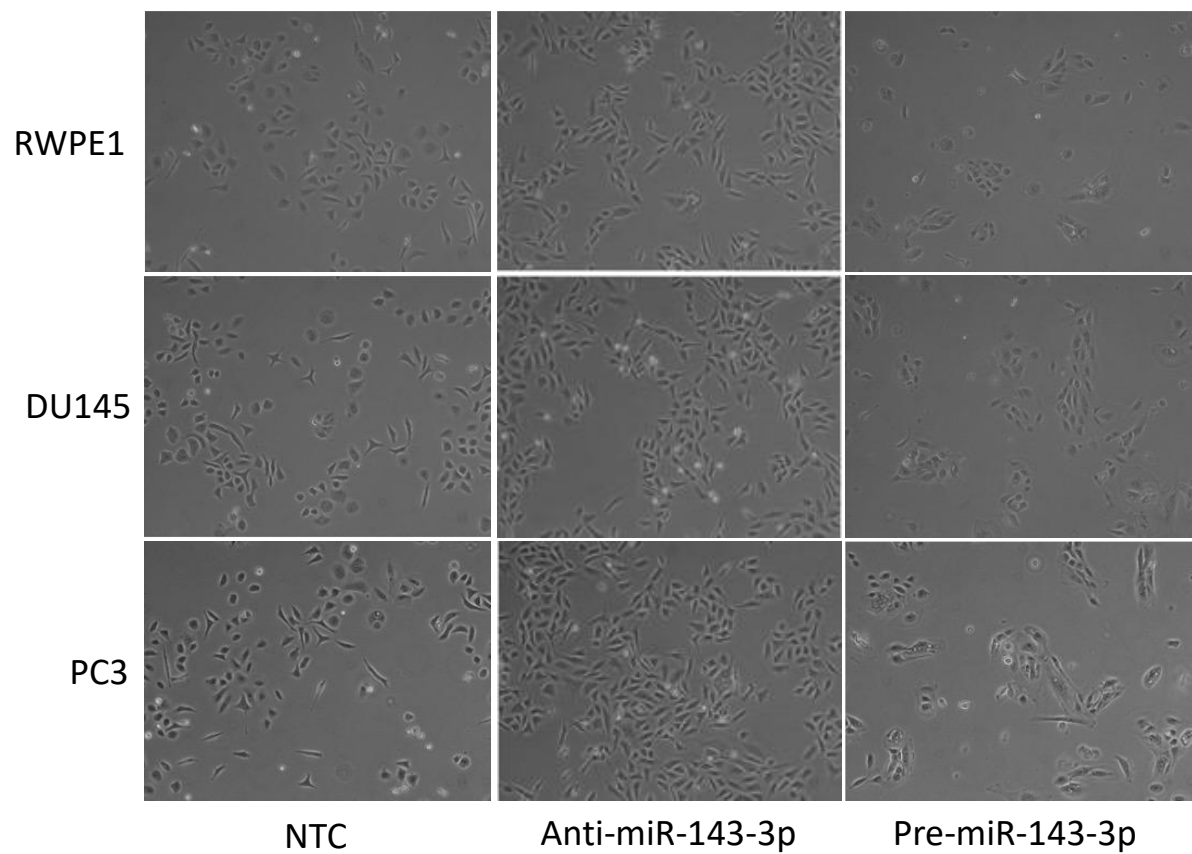

**Figure S6: Representative images of clonogenicity assay.** miR-143-3p alters colony forming capacity of RWPE1, DU145 and PC3 cell lines. Cell count performed using ImageJ software at 72 hours post transfection. Pre-miR-Neg, Anti-miR-143-3p, Pre-miR-143-3p (25 nM).

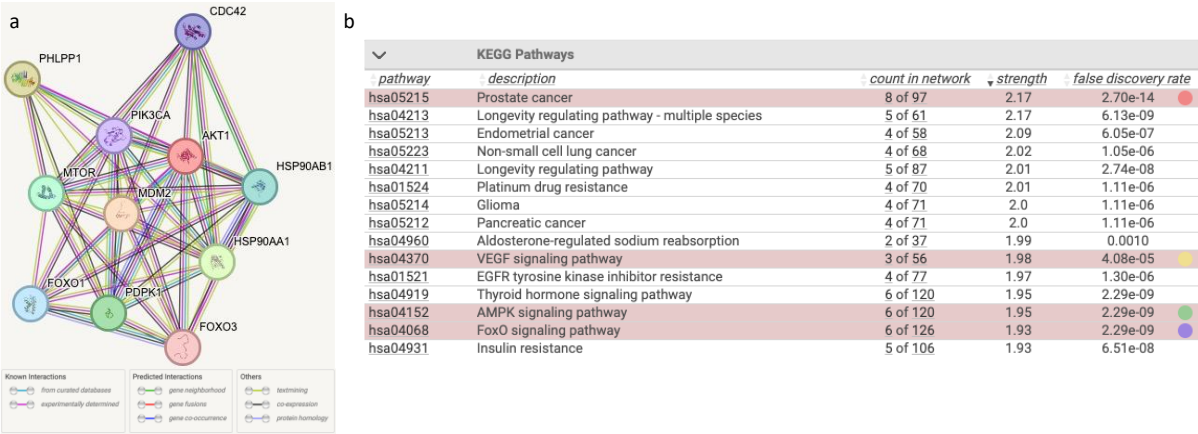

**Figure S7. Network analysis of AKT1 protein interactions.** (a) Visualization of network by String-DB Version 12. (b) KEGG Pathway analysis of the AKT1 network is significantly associated with prostate cancer and pathways related to EMT.

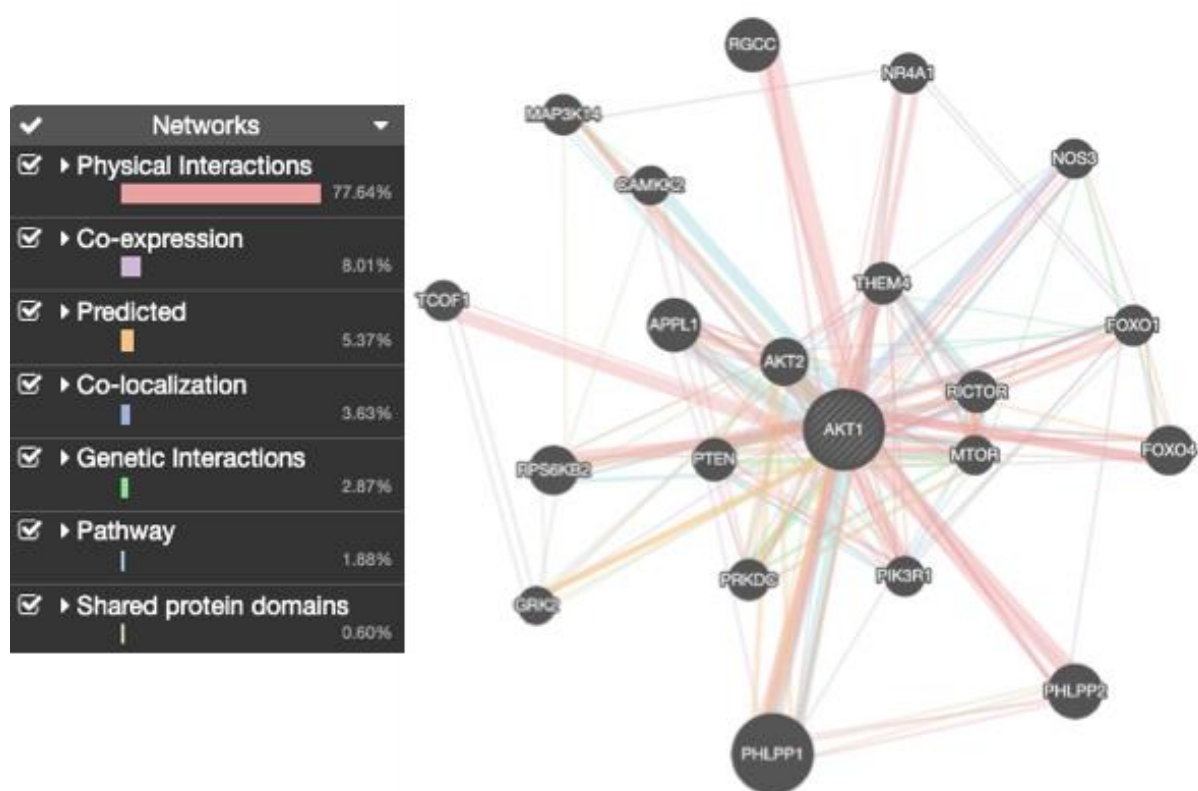

Figure S8. GeneMANIA network analysis of AKT1 gene interactions.



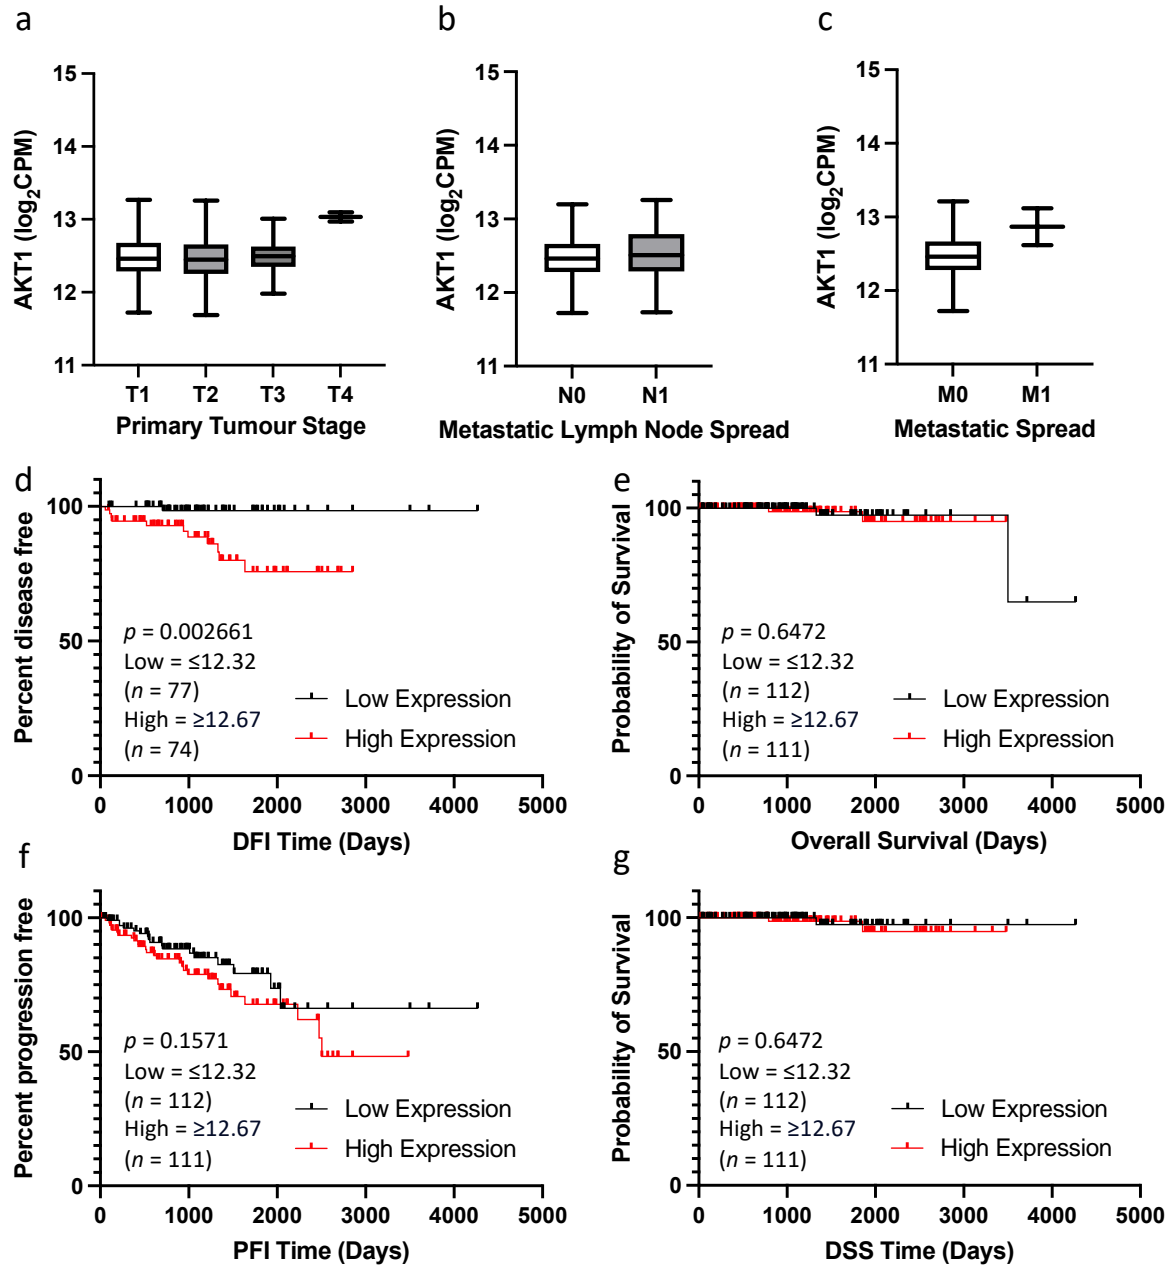

**Figure S9. Correlation between AKT1 expression and clinicopathological markers of PCa progression.** UCSC Xena analysis of TCGA PRAD samples shows AKT1 expression in (a) primary tumour stage, T1 ( $n = 152$ ), T2 ( $n = 164$ ), T3 ( $n = 50$ ) and T4 ( $n = 2$ ), (b) metastatic lymph node spread, N0 ( $n = 302$ ) and N1 ( $n = 65$ ) and (c) metastatic spread M0 ( $n = 365$ ) and M1 ( $n = 2$ ). For KM plots, patients were divided into quartiles based on AKT1 expression. (d) High expression of AKT1 was associated with significantly reduced DFI, Low =  $\leq 12.32$  ( $n = 77$ ), High =  $\geq 12.67$  ( $n = 74$ ). (e) No significant difference was observed between AKT1 expression and overall survival, Low =  $\leq 12.32$  ( $n = 112$ ), High =  $\geq 12.67$  ( $n = 111$ ) (f) No significant difference was observed between AKT1 expression and DSS, Low =  $\leq 12.32$  ( $n = 112$ ), High =  $\geq 12.67$  ( $n = 111$ ). (g) No significant difference was observed between AKT1 expression and PFI, Low =  $\leq 12.32$  ( $n = 112$ ), High =  $\geq 12.67$  ( $n = 111$ ).  $p$ -values for KM plots generated via log-rank (Mantel-Cox) tests. CPM = Copies per million;  $n$  = number; DFI = disease free interval; DSS = disease specific survival; PFI = Progression free interval.

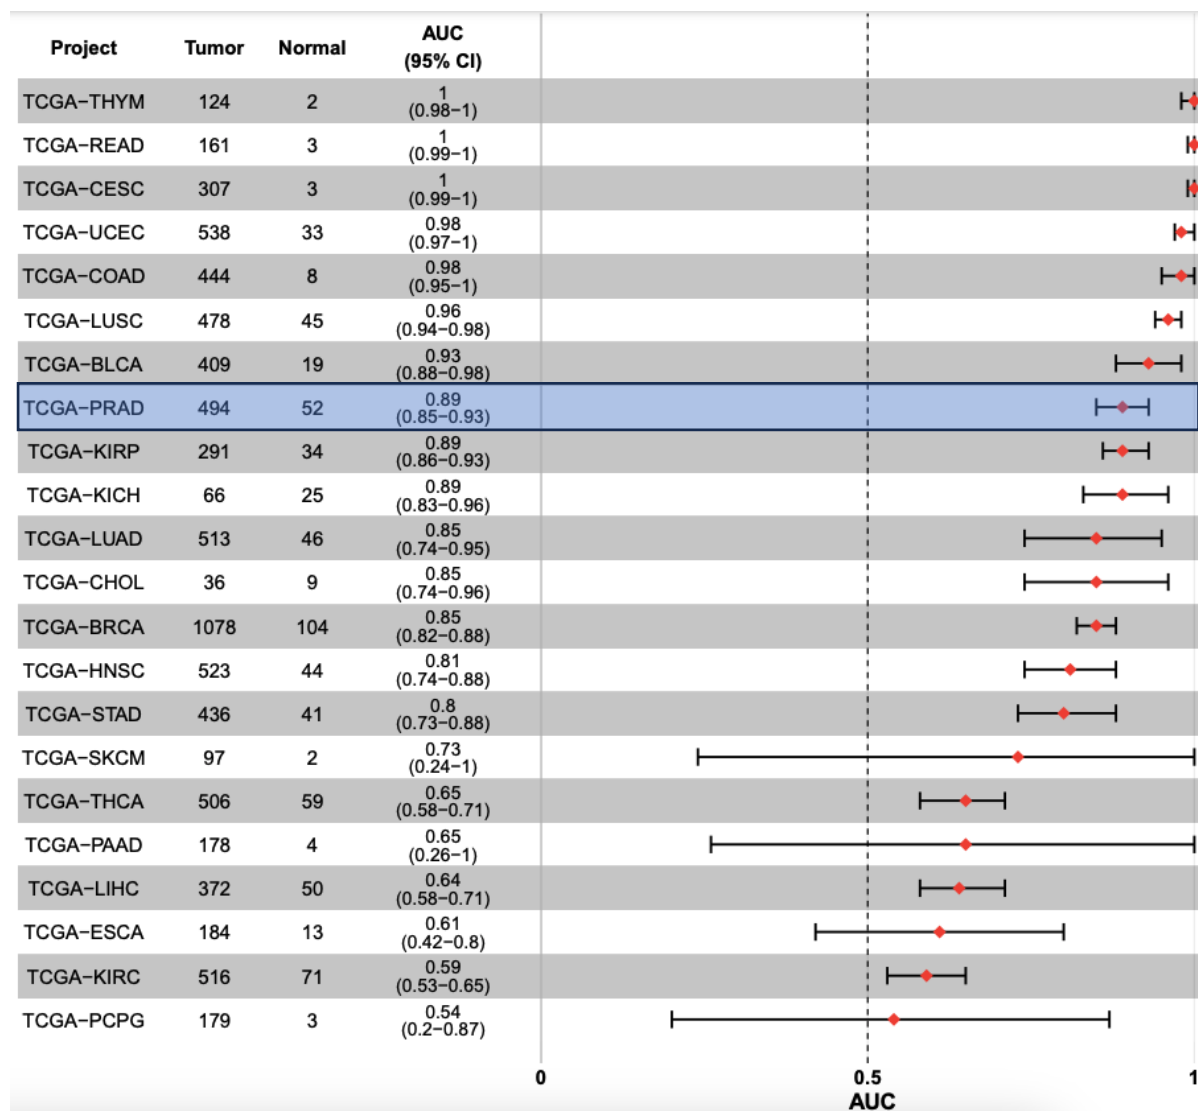

**Figure S10. CancerMIRNome TCGA Pan- Cancer ranked forest plots of miR-143-3p ROC analysis shows miR-143-3p has significant diagnostic value in multiple cancer types. Result for prostate cancer is enclosed in the blue box (TCGA-PRAD).**

**Table S1. KM plotter meta-analysis results of overall survival in various cancers comparing high/low expression of AKT1 and miR-143.** Only cancers for which log-rank  $p < 0.05$  are presented. HR estimated for high compared to low expression (Cox proportional analysis, auto-selected cut-off).

|                   | <i>Cancer</i>                         | <i>n</i> | <i>HR*</i> | <i>Log-rank p-value</i> |
|-------------------|---------------------------------------|----------|------------|-------------------------|
| <i>AKT1</i>       | Breast cancer                         | 1089     | 1.45       | 0.0308                  |
|                   | Cervical squamous cell carcinoma      | 304      | 1.69       | 0.0427                  |
|                   | Oesophageal Adenocarcinoma            | 80       | 0.26       | 0.0001                  |
|                   | Head-neck squamous cell carcinoma     | 499      | 1.42       | 0.0098                  |
|                   | Kidney renal papillary cell carcinoma | 287      | 0.45       | 0.0292                  |
|                   | Liver hepatocellular carcinoma        | 370      | 1.7        | 0.0025                  |
|                   | Lung adenocarcinoma                   | 504      | 0.7        | 0.0202                  |
|                   | Ovarian cancer                        | 373      | 0.65       | 0.0031                  |
|                   | Pancreatic ductal adenocarcinoma      | 177      | 0.6        | 0.0305                  |
| <i>miR-143-3p</i> | Bladder Carcinoma                     | 408      | 1.75       | 0.0002                  |
|                   | Head-neck squamous cell carcinoma     | 522      | 1.37       | 0.0196                  |
|                   | Kidney renal clear cell carcinoma     | 516      | 0.71       | 0.0224                  |
|                   | Kidney renal papillary cell carcinoma | 290      | 2.77       | 0.0005                  |
|                   | Pancreatic ductal adenocarcinoma      | 178      | 2.06       | 0.0007                  |
|                   | Sarcoma                               | 259      | 0.61       | 0.0334                  |

\* Red text indicates HR > 1; high expression of miR-143 or AKT1 predicted poor prognosis; blue text indicates HR < 1; low expression of miR-143-3p or AKT1 predicted favourable prognosis.  $n$  = number; HR = Hazard ratio; KM = Kaplan-Meier
